# Supplementary material for: Enhancement of PM2.5 exposure estimation using PM10 observations
Source: Royal Society of Chemistry journal article supplement (doi:10.1039/c4em00026a), 2014-01-01
Supplement: c4em00026a1.pdf [file c4em00026a1.pdf]

# Electronic Supplementary Information for: Enhancement of PM<sub>2.5</sub> exposure estimation using PM<sub>10</sub> observations<sup>†</sup>

Yuval,<sup>\*</sup> and David M. Broday

*Received Xth XXXXXXXXXXXX 20XX, Accepted Xth XXXXXXXXXXXX 20XX*

*First published on the web Xth XXXXXXXXXXXX 200X*

DOI: 10.1039/b000000x

The Electronic Supplementary Information file provides four additional tables. The tables are similar to Table 3 of the paper but give results for different exposure time scales.

**Table 1** The  $R^2$ , MB and NME performance measures of the across-stations transferability testing, calculated using the half-hourly  $\text{PM}_{2.5}$  concentrations. The results are provided for the simulation schemes  $\text{LR}_1$  and  $\text{RT}_1$  (note that  $\text{LR}_o$  and  $\text{RT}_o$  are identical to  $\text{LR}_1$  and  $\text{RT}_1$ , respectively, see the Methods section for details). The station denoting each row is the one whose data were used for the model development. The measures were calculated using the data of the stations denoting the columns.

|               |     | $R^2$ |      |      | MB    |      |       | NME |     |     |
|---------------|-----|-------|------|------|-------|------|-------|-----|-----|-----|
|               |     | TMM   | YLB  | NSH  | TMM   | YLB  | NSH   | TMM | YLB | NSH |
| $\text{LR}_1$ | TMM | *     | 0.94 | 0.91 | *     | 0.02 | -3.33 | *   | 20  | 30  |
|               | YLB | 0.94  | *    | 0.91 | -1.84 | *    | -3.30 | 19  | *   | 30  |
|               | NSH | 0.93  | 0.94 | *    | 3.48  | 3.46 | *     | 24  | 27  | *   |
| $\text{RT}_1$ | TMM | *     | 0.94 | 0.87 | *     | 0.72 | -1.80 | *   | 18  | 26  |
|               | YLB | 0.94  | *    | 0.83 | -0.19 | *    | -1.71 | 17  | *   | 28  |
|               | NSH | 0.86  | 0.88 | *    | 3.46  | 3.02 | *     | 31  | 31  | *   |

**Table 2** The  $R^2$ , MB ( $\mu\text{g m}^{-3}$  units) and NME (%) performance measures of the across-stations transferability, calculated using the weekly (336 time points) mean  $\text{PM}_{2.5}$  concentrations. The results are provided for the four simulation schemes:  $\text{LR}_o$ ,  $\text{LR}_{336}$ ,  $\text{RT}_o$  and  $\text{RT}_{336}$  (see the Methods section for details). The station denoting each row is the one whose data were used for the model development. The measures were calculated using the data of the stations denoting the columns.

|                   |     | $R^2$ |      |      | MB    |       |       | NME |     |     |
|-------------------|-----|-------|------|------|-------|-------|-------|-----|-----|-----|
|                   |     | TMM   | YLB  | NSH  | TMM   | YLB   | NSH   | TMM | YLB | NSH |
| $\text{LR}_o$     | TMM | *     | 0.92 | 0.86 | *     | 0.17  | -3.37 | *   | 11  | 22  |
|                   | YLB | 0.90  | *    | 0.87 | -1.72 | *     | -3.34 | 12  | *   | 22  |
|                   | NSH | 0.88  | 0.89 | *    | 3.58  | 3.65  | *     | 19  | 21  | *   |
| $\text{LR}_{336}$ | TMM | *     | 0.92 | 0.86 | *     | -2.22 | -6.85 | *   | 15  | 33  |
|                   | YLB | 0.91  | *    | 0.87 | -5.00 | *     | -8.10 | 21  | *   | 39  |
|                   | NSH | 0.77  | 0.78 | *    | 11.88 | 5.22  | *     | 49  | 35  | *   |
| $\text{RT}_o$     | TMM | *     | 0.93 | 0.86 | *     | 0.88  | -1.87 | *   | 10  | 16  |
|                   | YLB | 0.91  | *    | 0.83 | 0.16  | *     | -1.57 | 9   | *   | 17  |
|                   | NSH | 0.82  | 0.85 | *    | 3.79  | 3.20  | *     | 20  | 21  | *   |
| $\text{RT}_{336}$ | TMM | *     | 0.93 | 0.86 | *     | 0.66  | -2.36 | *   | 10  | 17  |
|                   | YLB | 0.91  | *    | 0.81 | -0.59 | *     | -2.20 | 9   | *   | 19  |
|                   | NSH | 0.84  | 0.87 | *    | 3.67  | 3.06  | *     | 20  | 21  | *   |

**Table 3** The  $R^2$ , MB ( $\mu\text{g m}^{-3}$  units) and NME (%) performance measures of the across-stations transferability, calculated using the monthly (1344 time points) mean  $\text{PM}_{2.5}$  concentrations. The results are provided for the four simulation schemes:  $\text{LR}_o$ ,  $\text{LR}_{1344}$ ,  $\text{RT}_o$  and  $\text{RT}_{1344}$  (see the Methods section for details). The station denoting each row is the one whose data were used for the model development. The measures were calculated using the data of the stations denoting the columns.

|                    |     | $R^2$ |      |      | MB    |       |       | NME |     |     |
|--------------------|-----|-------|------|------|-------|-------|-------|-----|-----|-----|
|                    |     | TMM   | YLB  | NSH  | TMM   | YLB   | NSH   | TMM | YLB | NSH |
| $\text{LR}_o$      | TMM | *     | 0.70 | 0.71 | *     | 0.39  | -3.43 | *   | 11  | 21  |
|                    | YLB | 0.82  | *    | 0.72 | -1.80 | *     | -3.39 | 10  | *   | 21  |
|                    | NSH | 0.81  | 0.67 | *    | 3.43  | 3.86  | *     | 18  | 23  | *   |
| $\text{LR}_{1344}$ | TMM | *     | 0.81 | 0.79 | *     | 2.89  | -1.42 | *   | 15  | 16  |
|                    | YLB | 0.86  | *    | 0.83 | -2.81 | *     | -4.84 | 13  | *   | 24  |
|                    | NSH | 0.53  | 0.39 | *    | 27.23 | 13.81 | *     | 107 | 66  | *   |
| $\text{RT}_o$      | TMM | *     | 0.80 | 0.78 | *     | 1.06  | -1.89 | *   | 11  | 15  |
|                    | YLB | 0.82  | *    | 0.78 | 0.06  | *     | -1.63 | 9   | *   | 15  |
|                    | NSH | 0.77  | 0.79 | *    | 3.80  | 3.29  | *     | 18  | 19  | *   |
| $\text{RT}_{1344}$ | TMM | *     | 0.82 | 0.80 | *     | 0.90  | -2.40 | *   | 10  | 16  |
|                    | YLB | 0.75  | *    | 0.74 | -0.97 | *     | -2.33 | 10  | *   | 17  |
|                    | NSH | 0.75  | 0.82 | *    | 3.65  | 3.35  | *     | 19  | 21  | *   |

**Table 4** The  $R^2$ , MB ( $\mu\text{g m}^{-3}$  units) and NME (%) performance measures of the across-stations transferability, calculated using the annual (17520 time points) mean  $\text{PM}_{2.5}$  concentrations. The results are provided for the four simulation schemes:  $\text{LR}_o$ ,  $\text{LR}_{17520}$ ,  $\text{RT}_o$  and  $\text{RT}_{17520}$  (see the Methods section for details). The station denoting each row is the one whose data were used for the model development. The measures were calculated using the data of the stations denoting the columns.

|                     |     | $R^2$ |      |       | MB     |       |        | NME |     |     |
|---------------------|-----|-------|------|-------|--------|-------|--------|-----|-----|-----|
|                     |     | TMM   | YLB  | NSH   | TMM    | YLB   | NSH    | TMM | YLB | NSH |
| $\text{LR}_o$       | TMM | *     | 0.32 | 0.31  | *      | 0.81  | -3.29  | *   | 7   | 17  |
|                     | YLB | 0.34  | *    | 0.28  | -1.23  | *     | -3.26  | 8   | *   | 17  |
|                     | NSH | 0.42  | 0.30 | *     | 4.07   | 4.57  | *      | 16  | 21  | *   |
| $\text{LR}_{17520}$ | TMM | *     | 0.65 | -0.02 | *      | 6.54  | 6.66   | *   | 30  | 32  |
|                     | YLB | 0.15  | *    | 0.00  | -117.7 | *     | -77.78 | 460 | *   | 370 |
|                     | NSH | 0.88  | 0.21 | *     | 69.86  | 15.56 | *      | 275 | 81  | *   |
| $\text{RT}_o$       | TMM | *     | 0.78 | 0.31  | *      | 1.18  | -1.56  | *   | 7   | 10  |
|                     | YLB | 0.75  | *    | 0.21  | -0.11  | *     | -1.62  | 5   | *   | 13  |
|                     | NSH | 0.70  | 0.56 | *     | 3.33   | 3.20  | *      | 14  | 16  | *   |
| $\text{RT}_{17520}$ | TMM | *     | 0.79 | 0.44  | *      | 0.94  | -2.19  | *   | 7   | 12  |
|                     | YLB | 0.73  | *    | 0.30  | -1.05  | *     | -2.60  | 6   | *   | 14  |
|                     | NSH | 0.70  | 0.59 | *     | 3.12   | 3.30  | *      | 14  | 16  | *   |
